# Supplementary material for: A Novel Self-Cleaving Viroid-Like RNA Identified in RNA Preparations from a Citrus Tree Is Not Directly Associated with the Plant
Source: MDPI journal article supplement (doi:10.3390/v14102265), 2022-10-15
Supplement: s1 [file s1]

# A Novel Self-Cleaving Viroid-Like RNA Identified in RNA Preparations from a Citrus Tree Is Not Directly Associated with the Plant

Beatriz Navarro <sup>1</sup>, Shuai Li <sup>1,2</sup>, Andreas Gisel <sup>3,4</sup>, Michela Chiumenti <sup>1</sup>, Maria Minutolo <sup>5</sup>, Daniela Alioto <sup>5</sup> and Francesco Di Serio <sup>1,\*</sup>

<sup>1</sup> Institute for Sustainable Plant Protection (IPSP), CNR, Via Amendola 122/D, 70126 Bari, Italy;

<sup>2</sup> Institute of Plant Protection, Jiangsu Academy of Agricultural Sciences, Nanjing, 210014, China;

<sup>3</sup> Istituto di Tecnologie Biomediche, Consiglio Nazionale delle Ricerche, 70126 Bari, Italy;

<sup>4</sup> International Institute of Tropical Agriculture, Ibadan 200001, Nigeria;

<sup>5</sup> Dipartimento di Agraria, Università degli Studi di Napoli Federico II, 80055 Portici (NA), Italy.

\* Correspondence: francesco.diserio@ipsp.cnr.it

## Supplementary material

**Table S1.** Primers used in this study

**Figure S1.** Pattern syntax used to search for hammerhead ribozyme structure in citrus RNA seq library

**Figure S2.** Contig containing the sequences conserved in most natural hammerhead ribozymes in each polarity strand and a terminal direct repeat.

**Figure S3.** CtaHVd-LR1 (+) or (–) transcript RNAs detected by Northern-blot hybridization with equalized full-length digoxigenin-labeled riboprobes.

**Figure S4.** Multiple-sequence alignment of full-length cDNAs of hammerhead viroid-like RNA 1 variants.

**Figure S5.** PCR and RT-PCR assays using DNA and RNA preparations from isolate 14A, respectively.

**Table S1.** Primers used in this study

| Name    | Sequence (5' to 3')      | position* | Used for                                                                                                                         |
|---------|--------------------------|-----------|----------------------------------------------------------------------------------------------------------------------------------|
| CH1 Rev | GTAAGAGCAGAGCCCTCATTTCTA | 140-117   | PCR of full-length CtaHVd-LR1 cDNA (coupled with CH2 For) and 5' RACE of the 3' fragment generated by the (+) HHRz self-cleavage |
| CH2 For | AGTATAATGGCGAGGTACCGTG   | 141-163   | PCR of full-length CtaHVd-LR1 cDNA (coupled with CH1 Rev) and 5' RACE of the 3' fragment generated by the (-) HHRz self-cleavage |
| CH3 Rev | CCTGGTCTCATCAGGCGC       | 34-17     | PCR of full-length CtaHVd-LR1 cDNA (coupled with CH4 For)                                                                        |
| CH4 For | CAGGTCGAAACACCTATTTGCT   | 35-56     | PCR of full-length CtaHVd-LR1 cDNA (coupled with CH3 Rev)                                                                        |
| CH5 Rev | AAACCGACCTCCGCAACTTCTG   | 444-423   | PCR of full-length CtaHVd-LR1 cDNA (coupled with CH6 For)                                                                        |
| CH6 For | GGGATCCAACCTAGCGGTTAAAT  | 445-468   | PCR of full-length CtaHVd-LR1 cDNA (coupled with CH5 Rev)                                                                        |

\* referred to variant CtaHVd-LR1\_3

---

```

* COMMAND
=====
// COMMAND Hammer Head
=====

//-----
// Hammer Head
//-----

R110 = {AT, TA, GC, CG, TG, GT}
L110 = 3...5 // Stem I
L120 = RTM
L130 = 3...7 // Stem II
L131 = 3...15 // loop II
L140 = CTGANGA
L141 = 0...2
L150 = G
L160 = 3...20 // Stem III
L170 = 3...50 // loop III
L180 = C
L190 = GAAAY

=====
// PATTERN SYNTAX
=====

//-----
// Hammer Head
//-----

P1 = L110 L120 P2 = L130 L131 R110~P2 L141 L140 L141 L150 P3 = L160 L170 R110~P3 L180 L141 L190 R110~P1

```

**Figure S1.** Pattern syntax used to search for hammerhead ribozyme structure in citrus RNA seq library

>NODE\_11827\_length\_651\_cov\_57.163636

Monomer (550 nt) { TTGAAGGAAGAAGTTG**TGGGTGTAGTGCCCTGTCGCCGGGGCGCCTGATGAGACCAAGGCA**  
**GGTCGAAACACCTA**TTTGCTGGCGAGGTCCGGGAACCTTGTTATGTCAAAAGAGAGGGTA  
AATCGGGGAAACTCGCCTCCTAGAAATGAGGGCTCTGCTCTTACAGTATAATGGCGAGGT  
ACCGTGCAGTTAGCAAGGGATTGCTAGCTTCTTTCATTTGGGAACCAATGAAGGAAGAC  
CTAGTTTACCCGCTTGCTTCGTGCGGAACCCGTTCACTTAACCGAAAGCGCAAGCTTCT  
CAGGTTTTGGAAGAGAGTGCCTGATAACACCTCTGAATTGAAAAACAAGACTCGGCTCC  
TCAAAAGCAAT**TGTGGATTTCGACCTGCTAAAAGTCTCATCAGGGCAGCCAGCGACAGGCG**  
**CCTATCCACAACCACCTC**GTTCTTCTTCAGAAGTCGCGGAGGTTCGGTTTGGGATCTAACCT  
AGCGGTAAATCAAATTTTACTTTGTAAAACCTGCTTAGTTCAGACCTGACACCAGCCCC  
Direct repeat { GTCGCTAATG**TTGAAGGAAGAAGTTGTGGGTGTAGTGCCCTGTCGCCGGGGCGCCTGATGA**  
**GACCAAGGCAGGTCGAAACACCTATTTGCTGGCGAGGTCCGGGAACCTTGT**

**Figure S2.** Contig containing the sequences conserved in most natural hammerhead ribozymes in each polarity strand (red and light-blue colors) and a terminal direct repeat (yellow background).

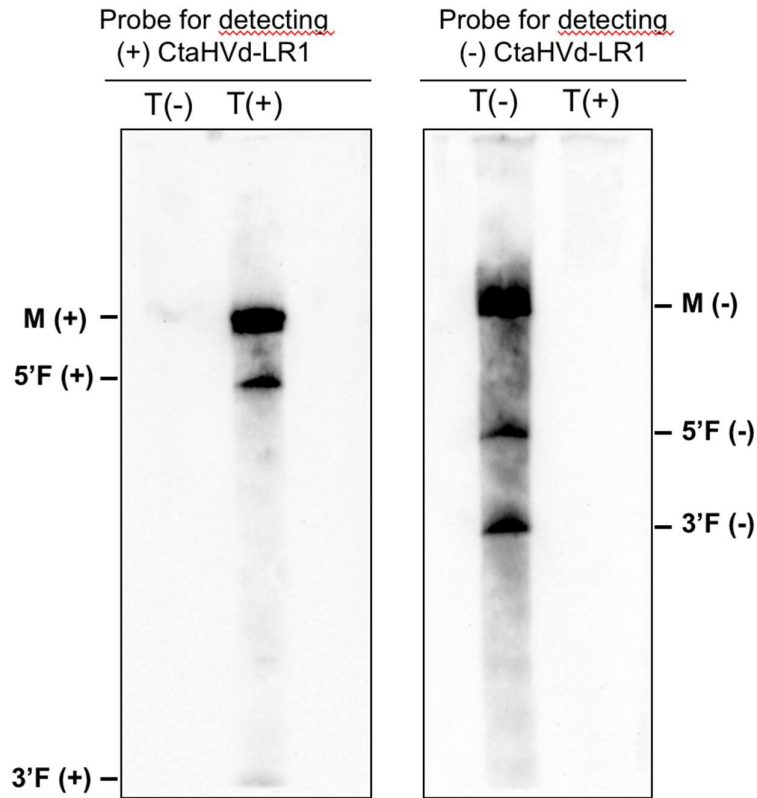

**Figure S3.** CtaHVd-LR1 (+) or (-) transcript RNAs detected by Northern-blot hybridization with equalized full-length digoxigenin-labeled riboprobes (left and right panel, respectively). Equal amounts of monomeric CtaHVd-LR1 (+) and (-) transcripts were loaded in lanes T(+) and T(-), respectively. The monomeric transcript (M) and the 5'F and 3'F fragments generated by the HHRzs are indicated.

|                  | <div style="display: inline-block; width: 150px; border-bottom: 1px solid black; position: relative;"> <span style="position: absolute; left: -10px; top: -5px; color: blue;">← Primer CH3 Rev</span> <span style="position: absolute; right: -10px; top: -5px; color: green;">Primer CH4 For →</span> </div> |    |
|------------------|---------------------------------------------------------------------------------------------------------------------------------------------------------------------------------------------------------------------------------------------------------------------------------------------------------------|----|
| CtaHVd-LR1_3     | GTGCCCTGTCGCCGGGCGCCTGATCAGACCAAGGCAGGTCGAAACACCTATTGCTGGCG                                                                                                                                                                                                                                                   | 60 |
| CtaHVd-LR1_36    | .....C.....                                                                                                                                                                                                                                                                                                   | 60 |
| CtaHVd-LR1_22    | .....A...                                                                                                                                                                                                                                                                                                     | 60 |
| CtaHVd-LR1_17    | .....T.....                                                                                                                                                                                                                                                                                                   | 60 |
| CtaHVd-LR1_23    | .....                                                                                                                                                                                                                                                                                                         | 60 |
| CtaHVd-LR1_20    | .....A...                                                                                                                                                                                                                                                                                                     | 60 |
| CtaHVd-LR1_24    | .....                                                                                                                                                                                                                                                                                                         | 60 |
| CtaHVd-LR1_19    | .....                                                                                                                                                                                                                                                                                                         | 60 |
| CtaHVd-LR1_18    | .....                                                                                                                                                                                                                                                                                                         | 60 |
| CtaHVd-LR1_21    | .....                                                                                                                                                                                                                                                                                                         | 60 |
| CtaHVd-LR1_11    | .....                                                                                                                                                                                                                                                                                                         | 60 |
| CtaHVd-LR1_5     | .....                                                                                                                                                                                                                                                                                                         | 60 |
| CtaHVd-LR1_10    | .....A...                                                                                                                                                                                                                                                                                                     | 60 |
| CtaHVd-LR1_2     | .....A...                                                                                                                                                                                                                                                                                                     | 60 |
| CtaHVd-LR1_33    | .....A.....                                                                                                                                                                                                                                                                                                   | 60 |
| CtaHVd-LR1_32    | .....                                                                                                                                                                                                                                                                                                         | 60 |
| CtaHVd-LR1_31    | .....                                                                                                                                                                                                                                                                                                         | 60 |
| CtaHVd-LR1_14    | .....G.....                                                                                                                                                                                                                                                                                                   | 60 |
| CtaHVd-LR1_9     | .....                                                                                                                                                                                                                                                                                                         | 60 |
| CtaHVd-LR1_35    | .....                                                                                                                                                                                                                                                                                                         | 60 |
| CtaHVd-LR1_12    | .....T.....                                                                                                                                                                                                                                                                                                   | 60 |
| CtaHVd-LR1_6     | .....                                                                                                                                                                                                                                                                                                         | 60 |
| CtaHVd-LR1_28    | .....                                                                                                                                                                                                                                                                                                         | 60 |
| CtaHVd-LR1_8     | .....                                                                                                                                                                                                                                                                                                         | 60 |
| CtaCtaHVd-LR1_34 | .....                                                                                                                                                                                                                                                                                                         | 60 |
| CtaHVd-LR1_29    | .....A...                                                                                                                                                                                                                                                                                                     | 60 |
| CtaHVd-LR1_27    | .....                                                                                                                                                                                                                                                                                                         | 60 |
| CtaHVd-LR1_16    | .....                                                                                                                                                                                                                                                                                                         | 60 |
| CtaHVd-LR1_30    | .....                                                                                                                                                                                                                                                                                                         | 60 |
| CtaHVd-LR1_25    | .....                                                                                                                                                                                                                                                                                                         | 60 |
|                  | ***** * ***** **                                                                                                                                                                                                                                                                                              |    |

|               |                                                               |     |
|---------------|---------------------------------------------------------------|-----|
| CtaHVd-LR1_3  | AGGTCCGGGAACCTTTGTTATGTCAAAAGAGAGGGTAAATCGGGGAAACTCGCCTCCTAGA | 120 |
| CtaHVd-LR1_36 | .....C.....                                                   | 120 |
| CtaHVd-LR1_22 | .....C.....                                                   | 120 |
| CtaHVd-LR1_17 | .....A.....                                                   | 120 |
| CtaHVd-LR1_23 | .....C.....                                                   | 120 |
| CtaHVd-LR1_20 | .....C.....                                                   | 120 |
| CtaHVd-LR1_24 | .....C.....T.....                                             | 120 |
| CtaHVd-LR1_19 | .....C.....                                                   | 120 |
| CtaHVd-LR1_18 | .....C.....                                                   | 120 |
| CtaHVd-LR1_21 | .....C.....                                                   | 120 |
| CtaHVd-LR1_11 | .....C.....A...                                               | 120 |
| CtaHVd-LR1_5  | .....C.....                                                   | 120 |
| CtaHVd-LR1_10 | .....C.....                                                   | 120 |
| CtaHVd-LR1_2  | .....C.....G.....                                             | 120 |
| CtaHVd-LR1_33 | .....A.....                                                   | 120 |
| CtaHVd-LR1_32 | .....C.....                                                   | 120 |
| CtaHVd-LR1_31 | .....C.....                                                   | 120 |
| CtaHVd-LR1_14 | .....C.....                                                   | 120 |
| CtaHVd-LR1_9  | .....C.....                                                   | 120 |
| CtaHVd-LR1_35 | .....C.....                                                   | 120 |
| CtaHVd-LR1_12 | .....C.....                                                   | 120 |
| CtaHVd-LR1_6  | .....C.....A.....                                             | 120 |
| CtaHVd-LR1_28 | .....C.....                                                   | 120 |
| CtaHVd-LR1_8  | .....C.....T.....                                             | 120 |
| CtaHVd-LR1_34 | .....C.....                                                   | 120 |
| CtaHVd-LR1_29 | .....                                                         | 120 |
| CtaHVd-LR1_27 | .....T.....                                                   | 120 |
| CtaHVd-LR1_16 | .....C.....                                                   | 120 |
| CtaHVd-LR1_30 | .....                                                         | 120 |
| CtaHVd-LR1_25 | .....C.....                                                   | 120 |
|               | ***** * ***** **                                              |     |

|               | Primer CH1 Rev                                                | Primer CH2 For |     |
|---------------|---------------------------------------------------------------|----------------|-----|
| CtaHVd-LR1_3  | AATGAGGGCTCTGCTCTTACAGTATAATGGCGAGGTACCGTGCAGTTAGCAAGGGATTGC  |                | 180 |
| CtaHVd-LR1_36 | .....T.....                                                   |                | 180 |
| CtaHVd-LR1_22 | .....A.....                                                   |                | 180 |
| CtaHVd-LR1_17 | .....A.....T.....                                             |                | 180 |
| CtaHVd-LR1_23 | .....A.....                                                   |                | 180 |
| CtaHVd-LR1_20 | .....A.....                                                   |                | 180 |
| CtaHVd-LR1_24 | .....A.....A.....                                             |                | 180 |
| CtaHVd-LR1_19 | .....A.....                                                   |                | 180 |
| CtaHVd-LR1_18 | .....A.....A.....                                             |                | 180 |
| CtaHVd-LR1_21 | .....A.....                                                   |                | 180 |
| CtaHVd-LR1_11 | .....                                                         |                | 180 |
| CtaHVd-LR1_5  | .....                                                         |                | 180 |
| CtaHVd-LR1_10 | .....                                                         |                | 180 |
| CtaHVd-LR1_2  | .....                                                         |                | 180 |
| CtaHVd-LR1_33 | .....A.....                                                   |                | 180 |
| CtaHVd-LR1_32 | .....                                                         |                | 180 |
| CtaHVd-LR1_31 | .....A.....                                                   |                | 180 |
| CtaHVd-LR1_14 | .....                                                         |                | 180 |
| CtaHVd-LR1_9  | .....                                                         |                | 180 |
| CtaHVd-LR1_35 | .....                                                         |                | 180 |
| CtaHVd-LR1_12 | .....                                                         |                | 180 |
| CtaHVd-LR1_6  | .....                                                         |                | 180 |
| CtaHVd-LR1_28 | .....                                                         |                | 180 |
| CtaHVd-LR1_8  | .....                                                         |                | 180 |
| CtaHVd-LR1_34 | .....                                                         |                | 180 |
| CtaHVd-LR1_29 | .....C.....A.....                                             |                | 180 |
| CtaHVd-LR1_27 | .....A.....                                                   |                | 180 |
| CtaHVd-LR1_16 | .....C.....                                                   |                | 180 |
| CtaHVd-LR1_30 | .....C.....A.....                                             |                | 180 |
| CtaHVd-LR1_25 | .....C.....A.....                                             |                | 180 |
|               | ***** * ***** ***** ** ***** *****                            |                |     |
| CtaHVd-LR1_3  | TAGCTTCTTTTCATTTGGGAAACCAATGAGAGAAGACCTAGTTTACCCGCTTGCTTCGTGC |                | 240 |
| CtaHVd-LR1_36 | .....C.....CCC.....CC..C..                                    |                | 240 |
| CtaHVd-LR1_22 | .....AG.....                                                  |                | 240 |
| CtaHVd-LR1_17 | .....AG.....                                                  |                | 240 |
| CtaHVd-LR1_23 | .....AG.....                                                  |                | 240 |
| CtaHVd-LR1_20 | .....AG.....                                                  |                | 240 |
| CtaHVd-LR1_24 | .....                                                         |                | 240 |
| CtaHVd-LR1_19 | .....                                                         |                | 240 |
| CtaHVd-LR1_18 | .....                                                         |                | 240 |
| CtaHVd-LR1_21 | .....                                                         |                | 240 |
| CtaHVd-LR1_11 | .....AG.....                                                  |                | 240 |
| CtaHVd-LR1_5  | .....C.....AG.....                                            |                | 240 |
| CtaHVd-LR1_10 | .....AG.....                                                  |                | 240 |
| CtaHVd-LR1_2  | .....AG.....                                                  |                | 240 |
| CtaHVd-LR1_33 | .....                                                         |                | 240 |
| CtaHVd-LR1_32 | .....AG.....                                                  |                | 240 |
| CtaHVd-LR1_31 | .....AG.....                                                  |                | 240 |
| CtaHVd-LR1_14 | .....AG.....                                                  |                | 240 |
| CtaHVd-LR1_9  | .....AG.....                                                  |                | 240 |
| CtaHVd-LR1_35 | .....AG.....T.....                                            |                | 240 |
| CtaHVd-LR1_12 | .....AG.....T.....                                            |                | 240 |
| CtaHVd-LR1_6  | .....AG.....T.....                                            |                | 240 |
| CtaHVd-LR1_28 | .....AG.....                                                  |                | 240 |
| CtaHVd-LR1_8  | .....AG.....                                                  |                | 240 |
| CtaHVd-LR1_34 | .....AG.....                                                  |                | 240 |
| CtaHVd-LR1_29 | .....                                                         |                | 240 |
| CtaHVd-LR1_27 | .....                                                         |                | 240 |
| CtaHVd-LR1_16 | .....                                                         |                | 240 |
| CtaHVd-LR1_30 | .....T.....                                                   |                | 240 |
| CtaHVd-LR1_25 | .....                                                         |                | 240 |
|               | ***** ***** ** ***** *** ***** **                             |                |     |

|               |                                                              |     |
|---------------|--------------------------------------------------------------|-----|
| CtaHVd-LR1_3  | GGGAACCCGTTCACTTAACCGAAAGCGCAAGCTTCTCAGGTTTGGGAAGTGAGAGTCCTG | 300 |
| CtaHVd-LR1_36 | .....CC.....CC.....C.....A...T.....                          | 300 |
| CtaHVd-LR1_22 | .....A...T.....                                              | 300 |
| CtaHVd-LR1_17 | .....                                                        | 300 |
| CtaHVd-LR1_23 | .....                                                        | 300 |
| CtaHVd-LR1_20 | .....A...T.....                                              | 300 |
| CtaHVd-LR1_24 | .....                                                        | 300 |
| CtaHVd-LR1_19 | .....                                                        | 300 |
| CtaHVd-LR1_18 | .....                                                        | 300 |
| CtaHVd-LR1_21 | .....                                                        | 300 |
| CtaHVd-LR1_11 | .....G.....A...T.....                                        | 300 |
| CtaHVd-LR1_5  | .....                                                        | 300 |
| CtaHVd-LR1_10 | .....A...T.....                                              | 300 |
| CtaHVd-LR1_2  | .....                                                        | 300 |
| CtaHVd-LR1_33 | .....                                                        | 300 |
| CtaHVd-LR1_32 | .....A...T.....                                              | 300 |
| CtaHVd-LR1_31 | .....                                                        | 300 |
| CtaHVd-LR1_14 | .....A.....                                                  | 300 |
| CtaHVd-LR1_9  | .....A...T.....                                              | 300 |
| CtaHVd-LR1_35 | .....A...T.....                                              | 300 |
| CtaHVd-LR1_12 | .....A...T.....                                              | 300 |
| CtaHVd-LR1_6  | .....A...T.....                                              | 300 |
| CtaHVd-LR1_28 | .....A...T.....                                              | 300 |
| CtaHVd-LR1_8  | .....A...T.....                                              | 300 |
| CtaHVd-LR1_34 | .....A...T.....                                              | 300 |
| CtaHVd-LR1_29 | .....                                                        | 300 |
| CtaHVd-LR1_27 | .....                                                        | 300 |
| CtaHVd-LR1_16 | .....CC.....                                                 | 300 |
| CtaHVd-LR1_30 | .....                                                        | 300 |
| CtaHVd-LR1_25 | .....                                                        | 300 |
|               | *****                                                        |     |

|                  |                                                               |     |
|------------------|---------------------------------------------------------------|-----|
| CtaHVd-LR1_3     | ATAATGCCTCTGAATTGAA-AAACAAAACCTCGGCTCCTCAAAAGCAATGTGGATTTCGAC | 359 |
| CtaHVd-LR1_36    | ...CC.....A.....G.....C.....                                  | 360 |
| CtaHVd-LR1_22    | ...A.....G.....G.....                                         | 359 |
| CtaHVd-LR1_17    | ...CA.....T.....                                              | 359 |
| CtaHVd-LR1_23    | ...CA.....G.....                                              | 359 |
| CtaHVd-LR1_20    | ...CA.....G.....G.....                                        | 359 |
| CtaHVd-LR1_24    | ...C.....T.G.....                                             | 359 |
| CtaHVd-LR1_19    | ...CA.....GT.....                                             | 359 |
| CtaHVd-LR1_18    | ...CA.....G.....G.....                                        | 359 |
| CtaHVd-LR1_21    | ...CA.....G.....A.....                                        | 359 |
| CtaHVd-LR1_11    | ...CA.....T.TG.....G.....                                     | 360 |
| CtaHVd-LR1_5     | ...CA.....G.....                                              | 359 |
| CtaHVd-LR1_10    | ...CA.....G.....                                              | 359 |
| CtaHVd-LR1_2     | ...CA.....T.....                                              | 359 |
| CtaHVd-LR1_33    | ...CA.....G.....                                              | 359 |
| CtaHVd-LR1_32    | ...CA.....G.....G.....                                        | 359 |
| CtaHVd-LR1_31    | ...CA.....GT.....                                             | 359 |
| CtaCtaHVd-LR1_14 | ...CA.....G.....                                              | 359 |
| CtaHVd-LR1_9     | ...CA.....G.....                                              | 359 |
| CtaHVd-LR1_35    | ...CA.....G.....A.....                                        | 359 |
| CtaHVd-LR1_12    | ...CA.....G.....G.....                                        | 359 |
| CtaHVd-LR1_6     | ...CA.....G.....                                              | 359 |
| CtaHVd-LR1_28    | ...CA.....G.....                                              | 359 |
| CtaHVd-LR1_8     | ...CA.....G.....                                              | 359 |
| CtaCtaHVd-LR1_34 | ...CA.....G.....                                              | 359 |
| CtaHVd-LR1_29    | ...CA.....T.....                                              | 359 |
| CtaHVd-LR1_27    | ...CA.....G.....                                              | 359 |
| CtaHVd-LR1_16    | ...CA.....G.....                                              | 359 |
| CtaHVd-LR1_30    | ...CA.....G.....                                              | 359 |
| CtaHVd-LR1_25    | ...CA.....G.....                                              | 359 |
|                  | **** ***** * * * **** * ***** *****                           |     |



| Accession     | Sequence                                                     | Position |
|---------------|--------------------------------------------------------------|----------|
| CtaHvd-LR1_3  | CTGCTAAAAGTCTCATCAGGGCAGCCAGCGCAGGGCGCCTATCCACAACCACTCGTTCTT | 419      |
| CtaHvd-LR1_36 | ...C...                                                      | 420      |
| CtaHvd-LR1_22 | ...TTT...G...G...                                            | 419      |
| CtaHvd-LR1_17 | ...A...                                                      | 419      |
| CtaHvd-LR1_23 | ...                                                          | 419      |
| CtaHvd-LR1_20 | ...                                                          | 419      |
| CtaHvd-LR1_24 | ...                                                          | 419      |
| CtaHvd-LR1_19 | ...C...                                                      | 419      |
| CtaHvd-LR1_18 | ...                                                          | 419      |
| CtaHvd-LR1_21 | ...                                                          | 419      |
| CtaHvd-LR1_11 | ...T...                                                      | 420      |
| CtaHvd-LR1_5  | ...                                                          | 419      |
| CtaHvd-LR1_10 | ...                                                          | 419      |
| CtaHvd-LR1_2  | ...                                                          | 419      |
| CtaHvd-LR1_33 | ...A...                                                      | 419      |
| CtaHvd-LR1_32 | ...G...                                                      | 419      |
| CtaHvd-LR1_31 | ...                                                          | 419      |
| CtaHvd-LR1_14 | ...                                                          | 419      |
| CtaHvd-LR1_9  | ...                                                          | 419      |
| CtaHvd-LR1_35 | ...A...                                                      | 419      |
| CtaHvd-LR1_12 | ...                                                          | 419      |
| CtaHvd-LR1_6  | ...                                                          | 419      |
| CtaHvd-LR1_28 | ...                                                          | 419      |
| CtaHvd-LR1_8  | ...                                                          | 419      |
| CtaHvd-LR1_34 | ...                                                          | 419      |
| CtaHvd-LR1_29 | ...A...                                                      | 419      |
| CtaHvd-LR1_27 | ...G...                                                      | 419      |
| CtaHvd-LR1_16 | ...C...                                                      | 419      |
| CtaHvd-LR1_30 | ...G...G...                                                  | 419      |
| CtaHvd-LR1_25 | ...G...                                                      | 419      |

|               |                                                              |     |
|---------------|--------------------------------------------------------------|-----|
| CtaHVd-LR1_3  | CTTTGTAAACCTGCTTAGTTTCGGACCTGACACCAGCCCCGTCGCTAATGTTGAAGGAAG | 536 |
| CtaHVd-LR1_36 | .....CC.....A..CC..CC.A.....C.....                           | 537 |
| CtaHVd-LR1_22 | .....A.....A.....                                            | 537 |
| CtaHVd-LR1_17 | .....                                                        | 537 |
| CtaHVd-LR1_23 | .....A.....A.....                                            | 537 |
| CtaHVd-LR1_20 | .....A..G.....                                               | 537 |
| CtaHVd-LR1_24 | .....A.....                                                  | 537 |
| CtaHVd-LR1_19 | .....                                                        | 537 |
| CtaHVd-LR1_18 | .....A.....A.....                                            | 537 |
| CtaHVd-LR1_21 | .....A.....                                                  | 537 |
| CtaHVd-LR1_11 | .....A.....A.....                                            | 537 |
| CtaHVd-LR1_5  | T....A.....A.....                                            | 538 |
| CtaHVd-LR1_10 | .....G...A...G...A.....G.....                                | 536 |
| CtaHVd-LR1_2  | .....A.....A.....                                            | 536 |
| CtaHVd-LR1_33 | .....A.....A.....                                            | 536 |
| CtaHVd-LR1_32 | .....G...A.....A.....                                        | 536 |
| CtaHVd-LR1_31 | .....A.....A.....                                            | 536 |
| CtaHVd-LR1_14 | .....A.....A.....                                            | 536 |
| CtaHVd-LR1_9  | .....A....G.....A.....                                       | 536 |
| CtaHVd-LR1_35 | .....A....G.....A.....                                       | 536 |
| CtaHVd-LR1_12 | .....A....A.....A.....                                       | 536 |
| CtaHVd-LR1_6  | .....A....G.....A.....                                       | 536 |
| CtaHVd-LR1_28 | .....A.G.....A.....                                          | 536 |
| CtaHVd-LR1_8  | .....A.....A.....                                            | 536 |
| CtaHVd-LR1_34 | .....A.....A.....                                            | 536 |
| CtaHVd-LR1_29 | .....G.....A.....                                            | 536 |
| CtaHVd-LR1_27 | .....GG.....G...A.....                                       | 536 |
| CtaHVd-LR1_16 | .....A.....C.....                                            | 536 |
| CtaHVd-LR1_30 | .....G.....A.....                                            | 536 |
| CtaHVd-LR1_25 | .....                                                        | 536 |
|               | *****      **    *    *    *****    *****    *****           |     |
|               |                                                              |     |
| CtaHVd-LR1_3  | AAGTTGTGGGTGTA                                               | 550 |
| CtaHVd-LR1_36 | .....                                                        | 551 |
| CtaHVd-LR1_22 | .....                                                        | 551 |
| CtaHVd-LR1_17 | .....                                                        | 551 |
| CtaHVd-LR1_23 | .....                                                        | 551 |
| CtaHVd-LR1_20 | .....                                                        | 551 |
| CtaHVd-LR1_24 | .....                                                        | 551 |
| CtaHVd-LR1_19 | .....                                                        | 551 |
| CtaHVd-LR1_18 | .....                                                        | 551 |
| CtaHVd-LR1_21 | .....                                                        | 551 |
| CtaHVd-LR1_11 | .....                                                        | 551 |
| CtaHVd-LR1_5  | .....                                                        | 552 |
| CtaHVd-LR1_10 | .....                                                        | 550 |
| CtaHVd-LR1_2  | .....                                                        | 550 |
| CtaHVd-LR1_33 | .....                                                        | 550 |
| CtaHVd-LR1_32 | .....                                                        | 550 |
| CtaHVd-LR1_31 | .....                                                        | 550 |
| CtaHVd-LR1_14 | .....                                                        | 550 |
| CtaHVd-LR1_9  | .....                                                        | 550 |
| CtaHVd-LR1_35 | .....                                                        | 550 |
| CtaHVd-LR1_12 | .....                                                        | 550 |
| CtaHVd-LR1_6  | .....                                                        | 550 |
| CtaHVd-LR1_28 | .....                                                        | 550 |
| CtaHVd-LR1_8  | .....                                                        | 550 |
| CtaHVd-LR1_34 | .....                                                        | 550 |
| CtaHVd-LR1_29 | .....                                                        | 550 |
| CtaHVd-LR1_27 | .....                                                        | 550 |
| CtaHVd-LR1_16 | .....                                                        | 550 |
| CtaHVd-LR1_30 | .....                                                        | 550 |
| CtaHVd-LR1_25 | .....                                                        | 550 |
|               | *****                                                        |     |

**Figure S4.** Multiple-sequence alignment of full-length cDNAs of citrus transiently associated hammerhead viroid-like RNA 1 variants amplified with primer pairs CH1 Rev/CH2 For (from variant CtaHVd-LR1\_2 to

CtaHVd-LR1\_12), CH3 Rev/CH4 For (variants CtaHVd-LR1\_14 to CtaHVd-LR1\_24) and CH5 Rev/CH6 For (variants CtaHVd-LR1\_25 to CtaHVd-LR1\_36). Names of the sequence variants and nucleotide positions in the alignment are reported on the left and the right, respectively. Regions covered by reverse (Rev) and forward (For) primers are marked by arrows (blue and green, respectively). Nucleotide identity and gaps with respect to the reference variant are indicated by dots and dashes, respectively. Regions involved in the formation of (+) and (-) hammerhead structures are in red and blue, respectively, with the nucleotides conserved in most natural hammerhead structures on a grey background. The reference variant (CtaHVd-LR\_3) reported at the top shares the highest identity with the consensus sequence of the alignment, from which it differs in six nucleotides not located in the conserved HHRzs motifs.

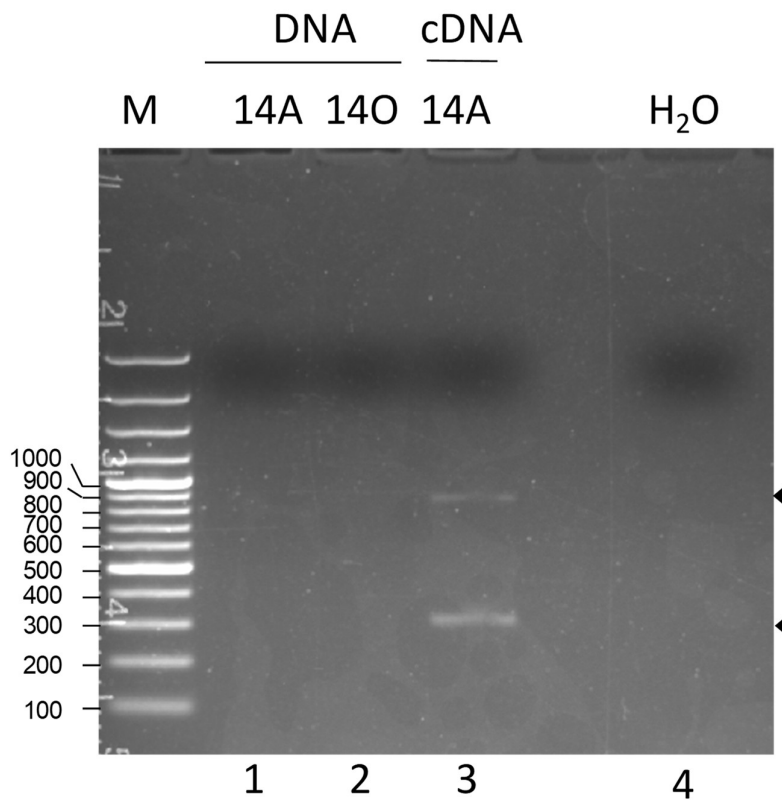

**Figure S5.** PCR and RT-PCR assays using DNA (lane 1) and RNA (lane 3) preparations from isolate 14A, respectively. A DNA preparation from the citrus isolate 14O (lane 2) and a mix in which water replaced DNA (lane 4) were used as negative controls for the PCR assay. Molecular Marker (M) is 100 bp ladder (New England Biolabs). Arrowhead on the left indicate the HVd-LR1 amplicon of 304 nt expected to be amplified by RT-PCR from isolate 14A and a larger amplicon deriving from the amplification of a larger than unit CtaHVd-LR1 cDNA.
